# Supplementary material
Source: MDPI journal article supplement (https://www.mdpi.com/2504-3900/87/1/21)
Supplement: s1 [file s1]

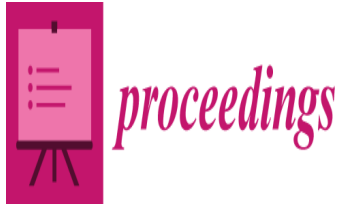

The 4th International Electronic Conference on Geosciences

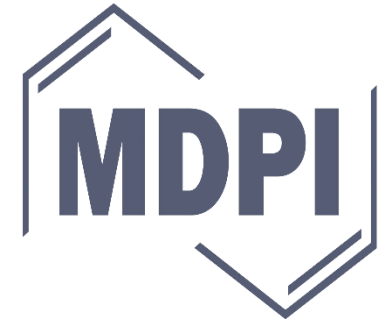

**Geoscientific Research for Natural Hazard & Risk Assessment**

**Analysis of mass slope movements on rocky sea cliffs: a distributed natural hazard in the Safi region, Morocco**

Imam Chaima\*<sup>1</sup>, Chaibi Mohamed <sup>2</sup>, Ayt Ougougdal Mohamed<sup>3</sup>, El Bchari Fatima <sup>3</sup>, Charif Abdessamad<sup>2</sup> et Ait Malek Halima <sup>3</sup>

<sup>1</sup> Equipe GEGEL/ Department of Geography, FLSH Marrakech - Cadi Ayyad University, Morocco.

<sup>2</sup> Equipe GEGEL/ Department of Geography, Polydisciplinary Faculty of Safi - Cadi Ayyad University - Marrakech, Morocco.

<sup>3</sup> Equipe GEGEL / Department of Sciences of the Earth and the Universe, Polydisciplinary Faculty of Safi - Cadi Ayyad University - Marrakech, Morocco.

\* Intervenant et correspondant auteur: [imam.chaimaa2019@gmail.com](mailto:imam.chaimaa2019@gmail.com)

- ✓ The rocky and cliffy coasts would represent nearly 80% of the coastal line.
- ✓ These spaces are coveted by human societies.
- ✓ This considerable geomorphological heritage, unfortunately, is subject to a continuous degradation.

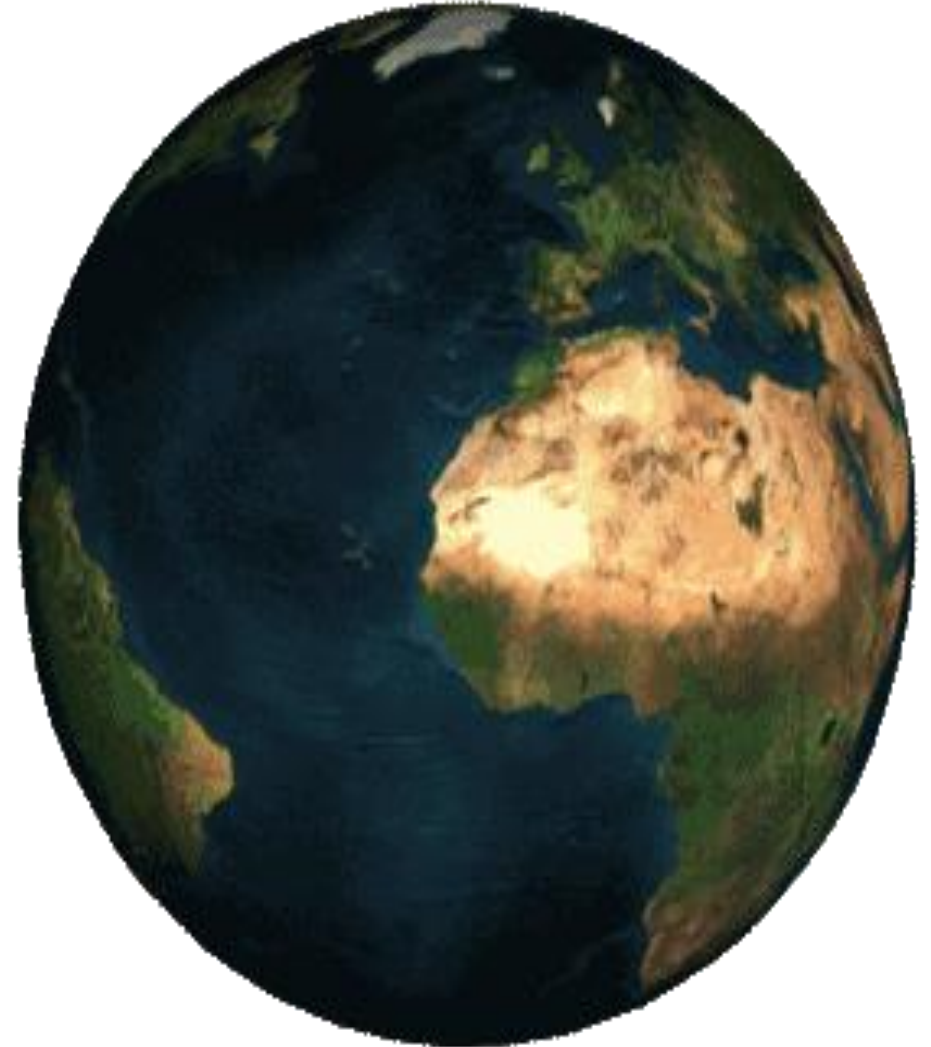

# Introduction

# Methodological approach

# Results & discussions

# Conclusion

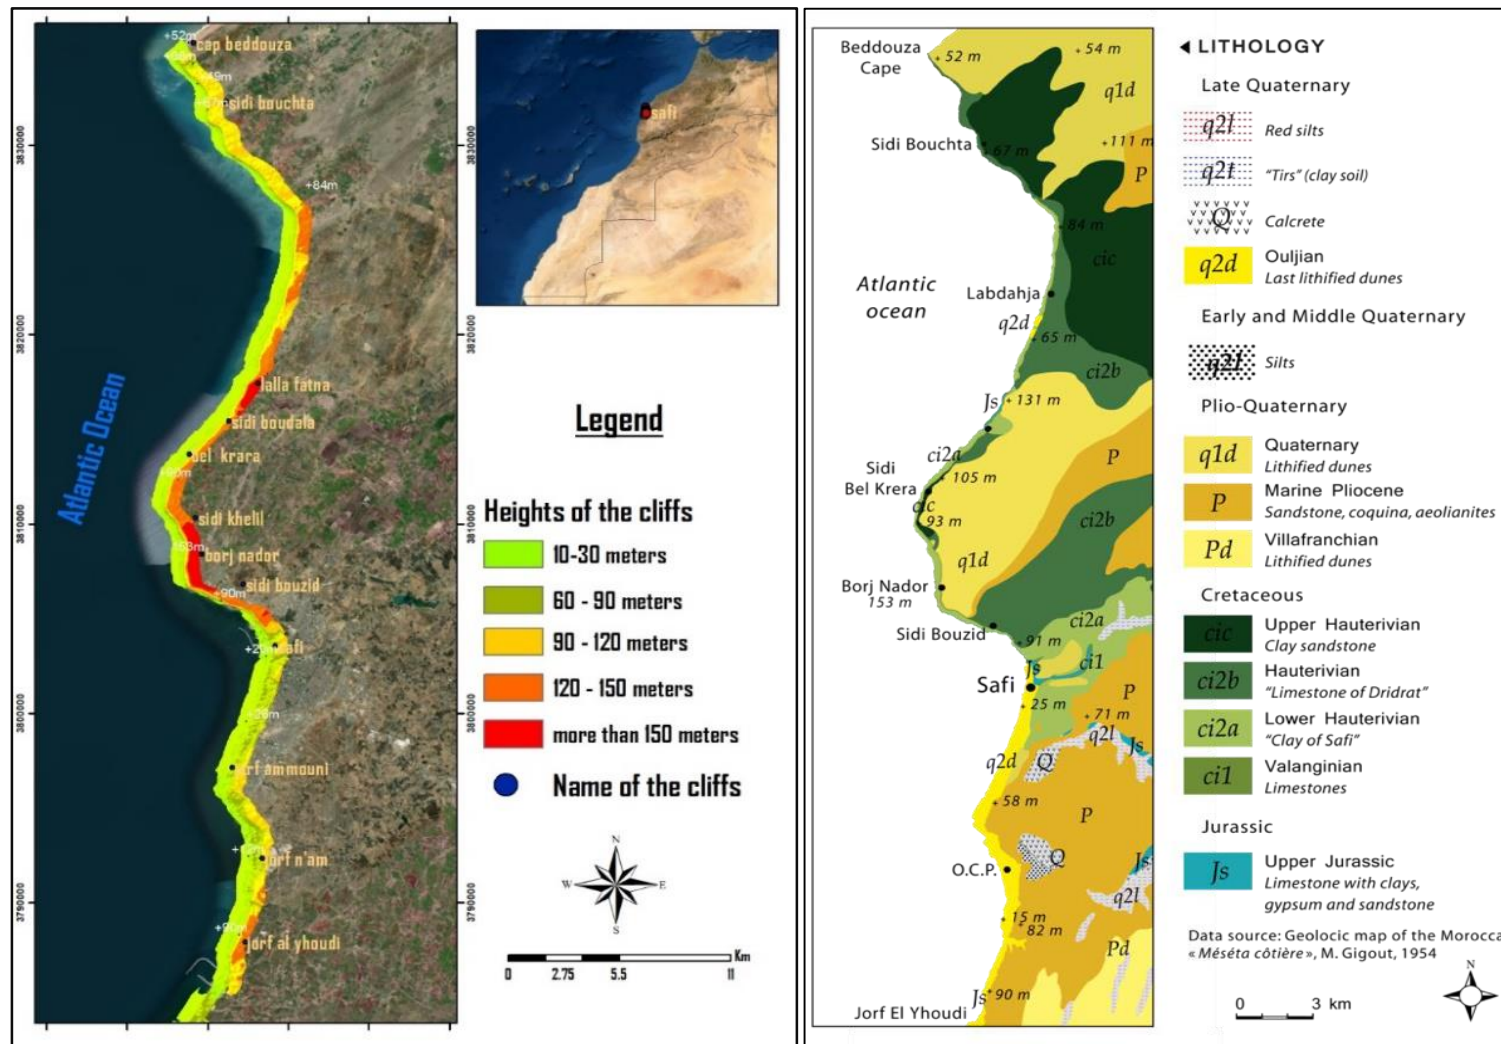

latitudes : 32° 00' 00''  
et 32° 40' 00'',  
longitudes : 08° 40' 00''  
et 09° 20' 00''.

Température moyenn  
e annuelle est de 19.0  
°C

précipitation  
moyenne de 350 mm

691983 habitants  
(2014)

Location and geological map of the study area

# Introduction

# Methodological approach

# Results & discussions

# Conclusion

Topographic maps  
Aerial photos

Data collection

Georeferencing  
Reference line  
definition

Pre-processing

Digitalization  
Baseline creation  
Transect creation  
Automatic DSAS calculations  
\*NSM / \*Epr

Data creation & calculations

Evolution of cliff morphology

Field work on risk areas

Characterization of the types  
of ground movements.

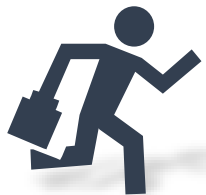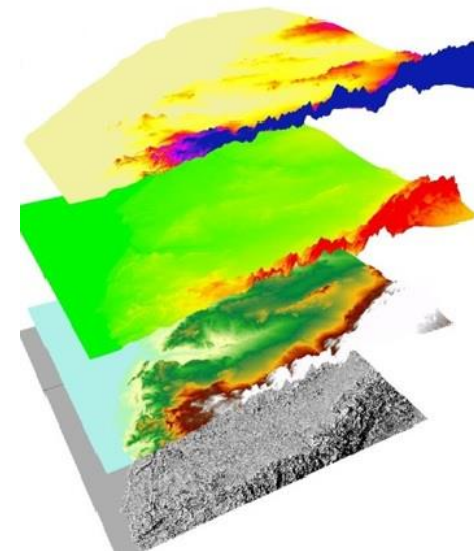

# Introduction

# Methodological approach

# Results & discussions

# Conclusion

Spatialization of recession severity in the high cliffs for the northern (A) and southern (B) sectors

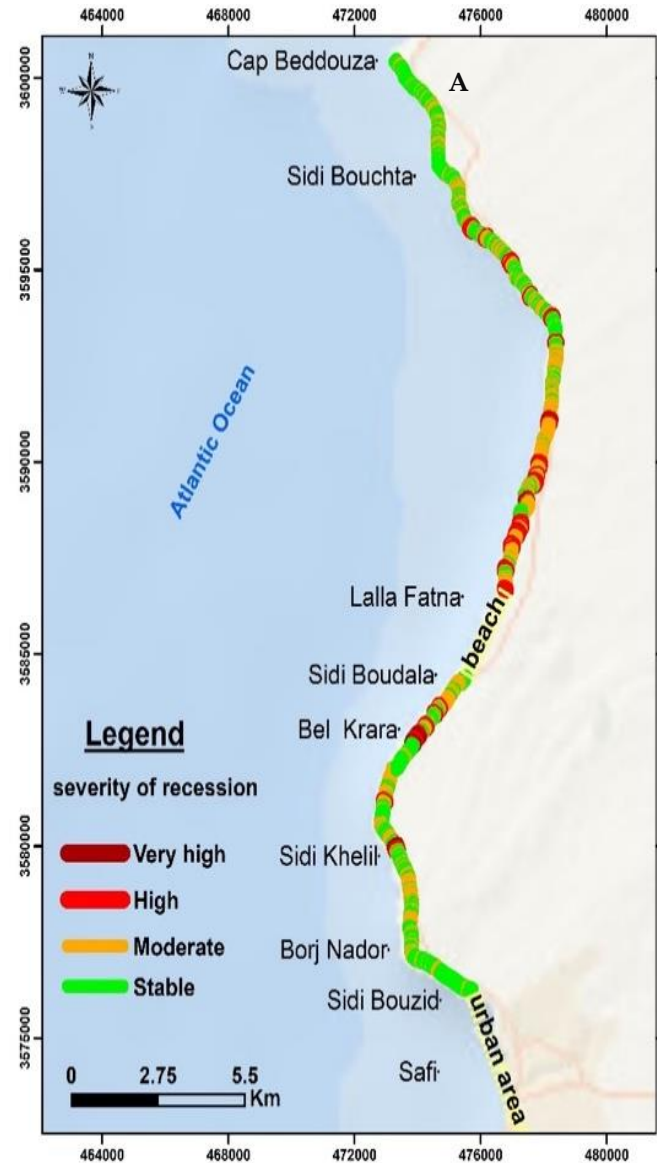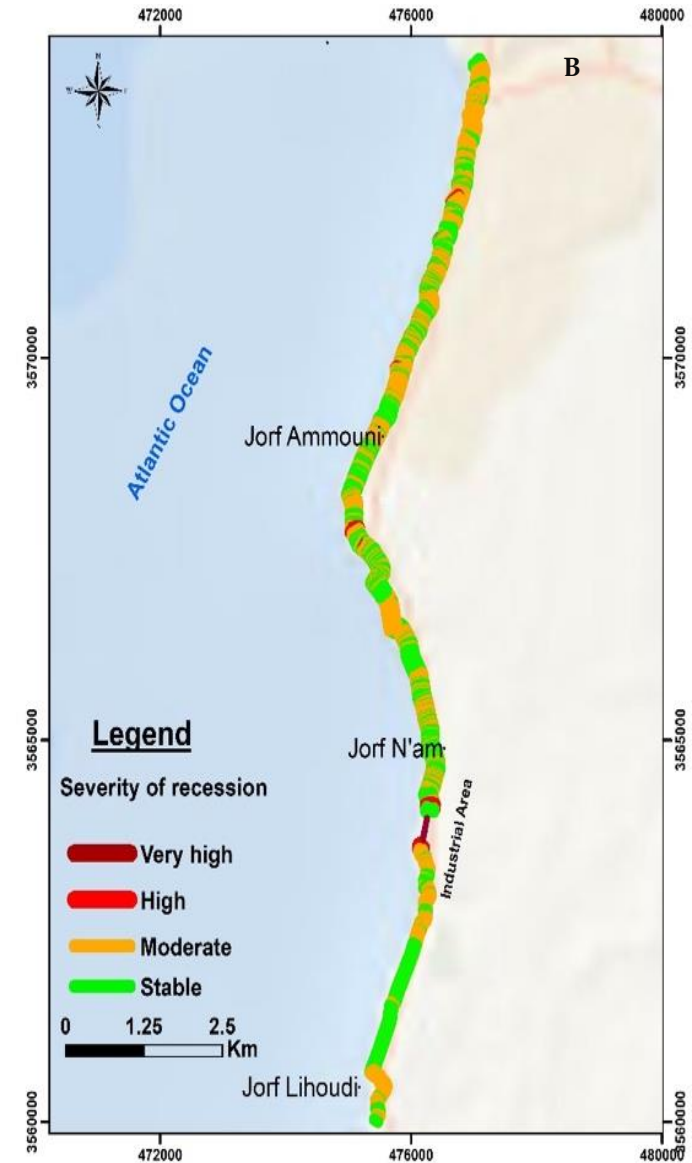

## Introduction

## Methodological approach

## Results & discussions

## Conclusion

| northern sector                                | southern sector |               |
|------------------------------------------------|-----------------|---------------|
| Total transect number                          | 5492            | 3078          |
| Total transects that record erosion            | 4561            | 1608          |
| Total transects that record stable             | 931             | 1470          |
| percent of transects with erosion data         | 83%             | 52%           |
| percent of transects with stable data          | 17%             | 48%           |
| Shoreline length (km)                          | 27 km           | 17 km         |
| Mean regressive shoreline change rate (m/year) | -0.08 (m/year)  | 0.04 (m/year) |

Evolution of the position of the high cliff line between 1954 and 2020 (erosion/stable),

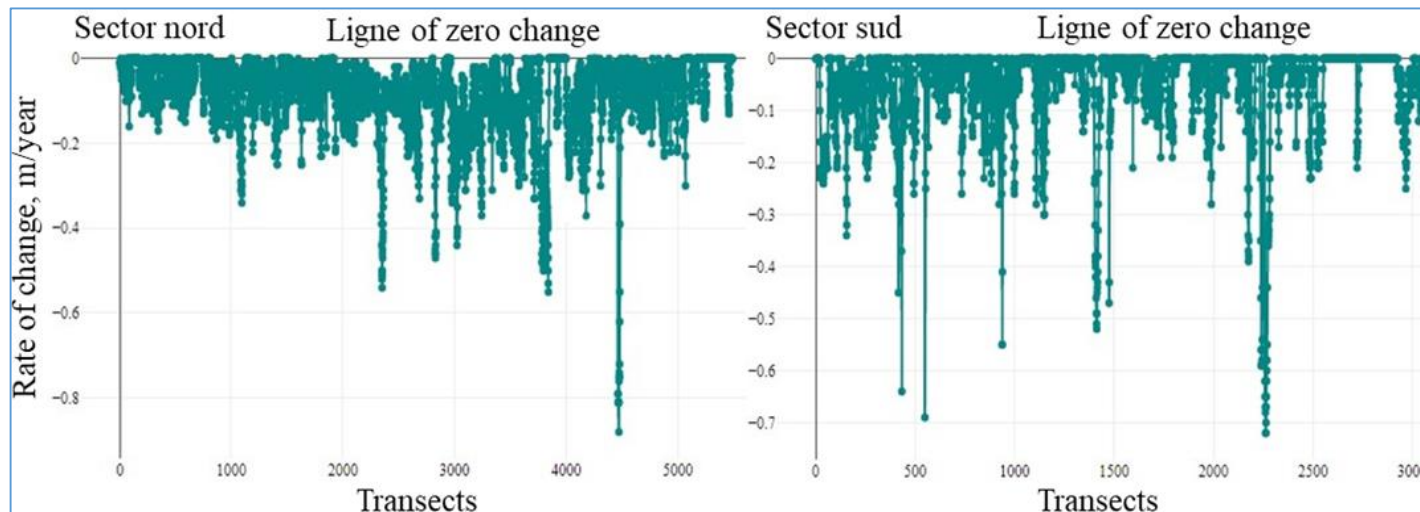

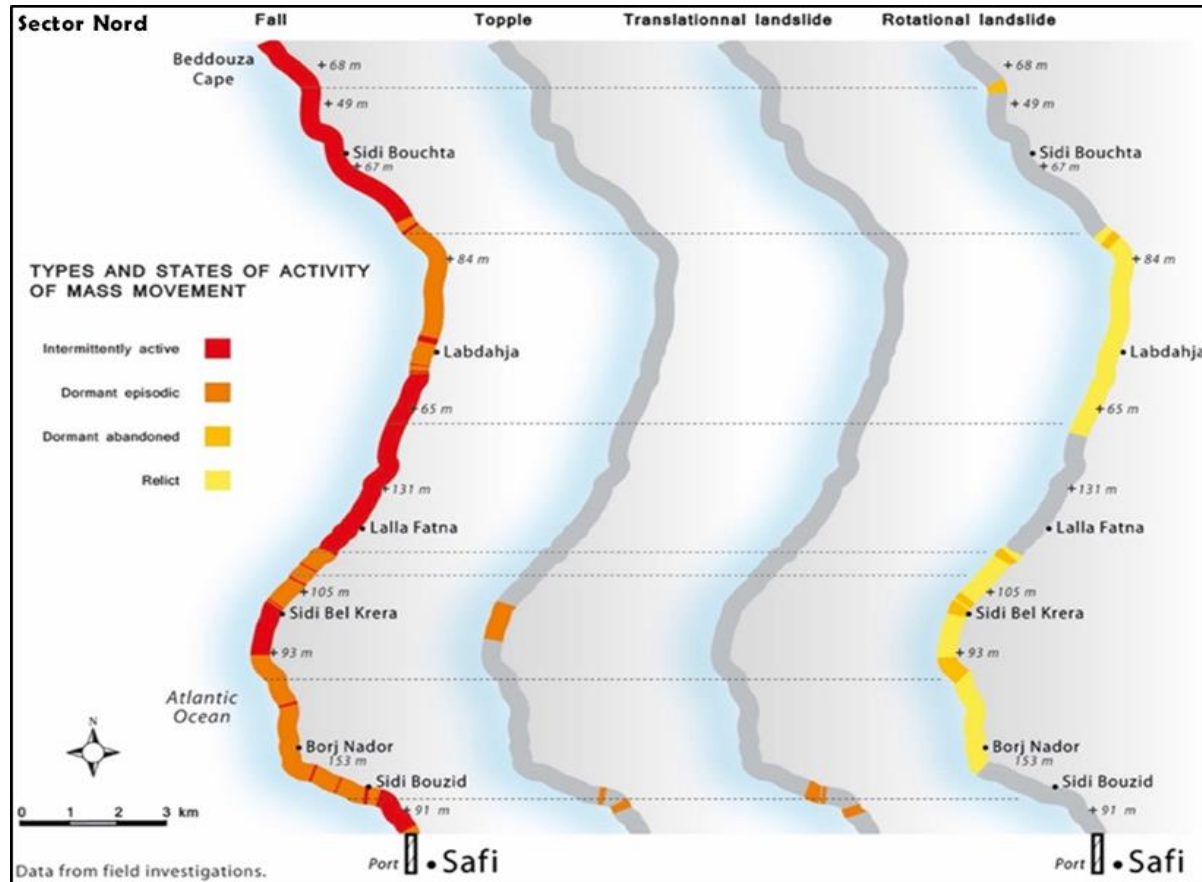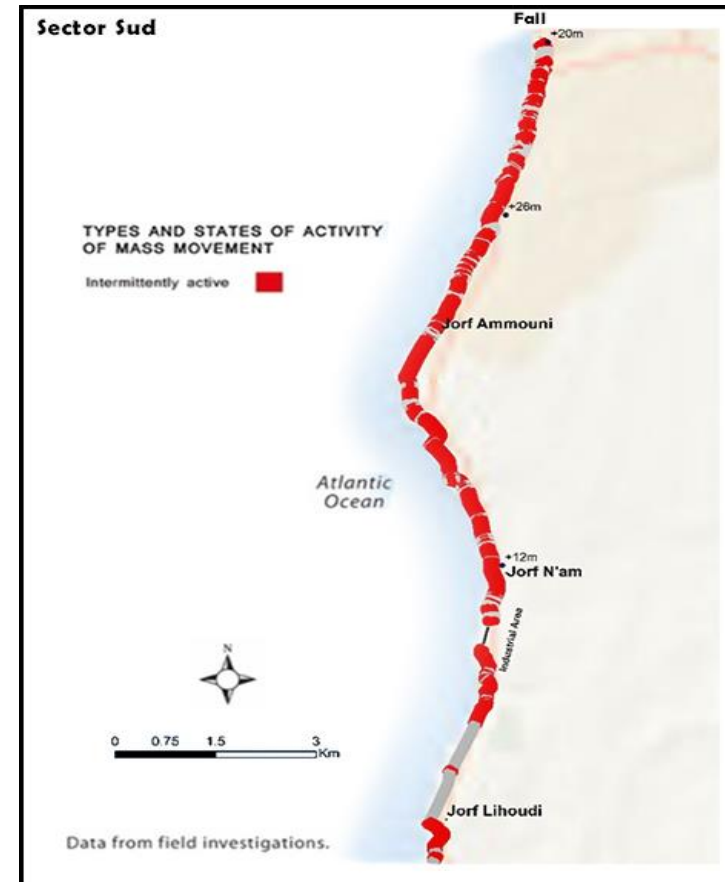

Spatialization of mass movement types and activity states in the northern and southern sector

**Introduction**

**Methodological  
approach**

**Results  
& discussions**

**Conclusion**

**This work advocates the establishment of a reliable, homogeneous, frequent and perennial monitoring of coastal dynamics and the agents and processes responsible.**
